# Supplementary material for: Who pays more? Exploring cost disparities in medication abortion access across socio-demographic groups in Ghana
Source: Springer Nature journal article supplement (doi:10.1186/s12939-025-02500-8), 2025-05-19
Supplement: MOESM1 [file 12939_2025_2500_MOESM1_ESM.docx]

**Appendix 1**

The Blinder-Oaxaca regression decomposition offers insights into understanding the difference in the means of an outcome variable (in this study, cost of medication abortion) between two groups (pharmacy versus clinic-based facilities)(Jann, 2008). The regression decomposes the difference into: 1. the portion that is explained by the differences in the levels of the independent variables and 2. the portion that cannot be explained by the differences in the explanatory variables (Hlavac, 2014).

Given that,

Hlavac (2014) shows that the mean difference in cost of medication abortion for the two groups can be written as:

(1)

However, based on a linear model, can also be written as:

(2)

where, X is a vector that contains the mean values of the explanatory variables while contains the coefficients of the regression.

Based on equation (2), the twofold decomposition can be specified as:

Unexplained portion

Explained portion

Where, is a non-discriminatory coefficient.
