# Supplementary material for: Who pays more? Exploring cost disparities in medication abortion access across socio-demographic groups in Ghana
Source: Springer Nature journal article supplement (doi:10.1186/s12939-025-02500-8), 2025-05-19
Supplement: MOESM3 [file 12939_2025_2500_MOESM3_ESM.docx]

**Appendix 3**

**Residuals versus fitted values plot**

The residuals are evenly and randomly distributed above and below the regression line.

**Variance Inflation Factor for the independent variables**
